# Supplementary material for: Restrained Eating Is Associated with Lower Cortical Thickness in the Inferior Frontal Gyrus in Adolescents
Source: MDPI journal article supplement (doi:10.3390/brainsci11080978), 2021-07-23
Supplement: s1 [file s1]

## Supplementary materials

**Table S1.** Executive function performance in adolescents

| Variables                                          | Uncontrolled eating (n=35) | Restrained eating (n=29) | Low problematic eating (n=44) | F     | p     |
|----------------------------------------------------|----------------------------|--------------------------|-------------------------------|-------|-------|
| Wisconsin Card Sorting Test – total errors         | 37.49 (22.43)              | 36.93 (20.54)            | 28.05 (15.06)                 | 0.223 | 0.114 |
| Trail Making Test – B minus A                      | 46.18 (30.25)              | 42.41 (18.35)            | 41.33 (19.29)                 | 0.427 | 0.654 |
| Letter-Number Sequencing (WAIS)                    | 17.29 (4.83)               | 17.59 (4.39)             | 18.17 (3.56)                  | 0.134 | 0.875 |
| Stroop – interference score                        | 2.90 (6.33)                | 3.65 (6.71)              | 2.86 (6.17)                   | 0.039 | 0.962 |
| Continuous performance test II – commission errors | 23.67 (5.99)               | 23.19 (7.98)             | 23.19 (6.08)                  | 1.502 | 0.228 |

**Table S2.** Description of eating patterns, demographical variables, and clinical characteristics of the three clusters in the neuroimaging subsample of adolescents.

| Domains                                | Variables                     | Uncontrolled eating (n=19)          | Restrained eating (n=16)            | Low problematic eating (n=26)       | F                              | p              |
|----------------------------------------|-------------------------------|-------------------------------------|-------------------------------------|-------------------------------------|--------------------------------|----------------|
| Intracuster variables (TFEQ; centered) | Cognitive restraint           | 0.02 (0.91)                         | 1.07 (0.63)                         | -0.80 (0.58)                        | 33.08                          | <0.001         |
|                                        | Disinhibited eating           | 1.00 (0.74)                         | -0.71 (0.80)                        | -0.29 (0.72)                        | 25.82                          | <0.001         |
|                                        | Emotional eating              | 1.07 (0.86)                         | -0.44 (0.59)                        | -0.72 (0.38)                        | 49.63                          | <0.001         |
| Extracuster validation (BITE)          | BITE symptoms                 | 6.64 (4.72)                         | 3.07 (2.37)                         | 2.35 (1.90)                         | 10.77                          | 0.001          |
| Demographic and clinical variables     | Age                           | 14.53 (1.93)                        | 14.33 (1.59)                        | 14.23 (1.56)                        | 0.17                           | 0.845          |
|                                        | Sex                           | 11 females (58%)<br>8 males (42%)   | 7 females (47%)<br>15 males (53%)   | 13 females (50%)<br>13 males (50%)  | X <sup>2</sup> (2)=0.474       | 0.789          |
|                                        | Waist (cm) / Height (cm)      | 0.52 (0.09)                         | 0.55 (0.08)                         | 0.47 (0.08)                         | 5.000                          | 0.009          |
|                                        | BMI                           | 27.69 (6.12)<br>6 lean (32%)        | 28.70 (5.61)<br>3 lean (20%)        | 22.97 (5.61)<br>16 lean (62%)       | 5.946<br>X <sup>2</sup> =17.57 | 0.005<br>0.002 |
|                                        | Body weight status            | 4 overweight (21%)<br>9 obese (47%) | 0 overweight (0%)<br>12 obese (80%) | 4 overweight (15%)<br>6 obese (23%) |                                |                |
|                                        | Anxiety and depression (HADS) | 9.21 (4.49)                         | 6.80 (4.38)                         | 6.23 (4.39)                         | 2.63                           | 0.081          |
|                                        |                               |                                     |                                     |                                     |                                |                |

**Table S3.** Executive function performance in adults

| <b>Variables</b>                                               | <b>Uncontrolled<br/>eating (n=54)</b> | <b>Restrained<br/>eating (n=61)</b> | <b>Low<br/>problematic<br/>eating (n=60)</b> | <b>F</b> | <b>p</b> |
|----------------------------------------------------------------|---------------------------------------|-------------------------------------|----------------------------------------------|----------|----------|
| Wisconsin<br>Card Sorting<br>Test – total<br>errors            | 29.61 (17.60)                         | 28.39 (18.55)                       | 25.85 (12.94)                                | 0.139    | 0.870    |
| Trail Making<br>Test – B<br>minus A                            | 41.59 (25.02)                         | 37.51 (25.22)                       | 37.17 (21.03)                                | 0.010    | 0.990    |
| Letter-<br>Number<br>Sequencing<br>(WAIS)                      | 10.76 (2.33)                          | 11.28 (2.44)                        | 11.32 (2.04)                                 | 0.653    | 0.522    |
| Stroop –<br>interference<br>score                              | 3.82 (5.89)                           | 2.584 (7.34)                        | 3.73 (7.13)                                  | 0.976    | 0.379    |
| Continuous<br>performance<br>test II –<br>commission<br>errors | 12.37 (6.70)                          | 12.64 (5.91)                        | 13.00 (6.87)                                 | 0.146    | 0.864    |

**Table S4.** Description of eating patterns, demographical variables, and clinical characteristics of the three clusters in the neuroimaging subsample of adults.

| Domains                                | Variables                     | Uncontrolled eating (n=32) | Restrained eating (n=42) | Low problematic eating (n=32) | F                        | p      |
|----------------------------------------|-------------------------------|----------------------------|--------------------------|-------------------------------|--------------------------|--------|
| Intracuster variables (TFEQ; centered) | Cognitive restraint           | 0.46 (0.86)                | 0.55 (0.64)              | -1.01 (0.51)                  | 56.10                    | <0.001 |
|                                        | Disinhibited eating           | 0.95 (0.73)                | -0.19 (0.44)             | -0.75 (0.60)                  | 69.38                    | <0.001 |
|                                        | Emotional eating              | 1.16 (0.54)                | -0.17 (0.49)             | -0.91 (0.37)                  | 160.0                    | <0.001 |
| Extracuster validation (BITE)          | BITE symptoms                 | 9.50 (4.41)                | 4.55 (3.22)              | 284 (2.40)                    | 33.11                    | <0.001 |
| Demographic and clinical variables     | Age                           | 31.31 (7.49)               | 30.50 (9.66)             | 31.53 (7.50)                  | 0.157                    | 0.855  |
|                                        |                               | 21 females (66%)           | 26 females (62%)         | 11 females (34%)              | X <sup>2</sup> (2)=7.757 | 0.020  |
|                                        | Sex                           | 11 males (34%)             | 16 males (38%)           | 21 males (66%)                |                          |        |
|                                        |                               |                            |                          |                               |                          |        |
|                                        | Waist (cm) / Height (cm)      | 0.59 (0.10)                | 0.56 (0.10)              | 0.49 (0.08)                   | 8.63                     | <0.001 |
|                                        | BMI                           | 30.39 (6.22)               | 29.59 (6.55)             | 25.07 (5.28)                  | 7.28                     | 0.001  |
|                                        |                               | 8 lean (25%)               | 9 lean (21%)             | 22 lean (69%)                 | X <sup>2</sup> (2)=34.09 | <0.001 |
|                                        |                               | 4 overweight (12.5%)       | 20 overweight (48%)      | 7 overweight (22%)            |                          |        |
|                                        | Body weight status            | 20 obese (62.5%)           | 13 obese (31%)           | 3 obese (9%)                  |                          |        |
|                                        | Anxiety and Depression (HADS) | 7.09 (4.43)                | 5.43 (3.42)              | 5.66 (4.32)                   | 1.724                    | 0.184  |

Adolescent sample

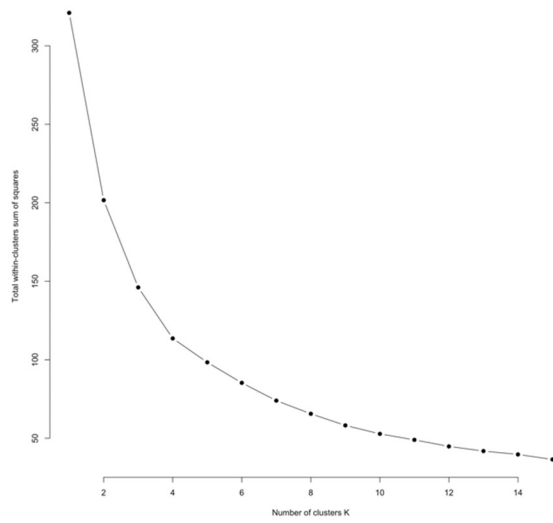

Adult sample

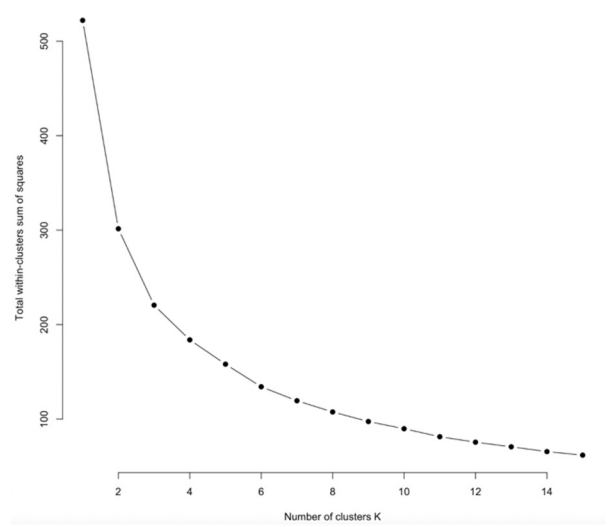

**Figure S1.** Within clusters sum of squares in the adolescent and the adult samples
